# Supplementary material for: Vacuolar Sugar Transporter TMT2 Plays Crucial Roles in Germination and Seedling Development in Arabidopsis
Source: MDPI journal article supplement (doi:10.3390/ijms242115852), 2023-11-01
Supplement: s1 [file s1]

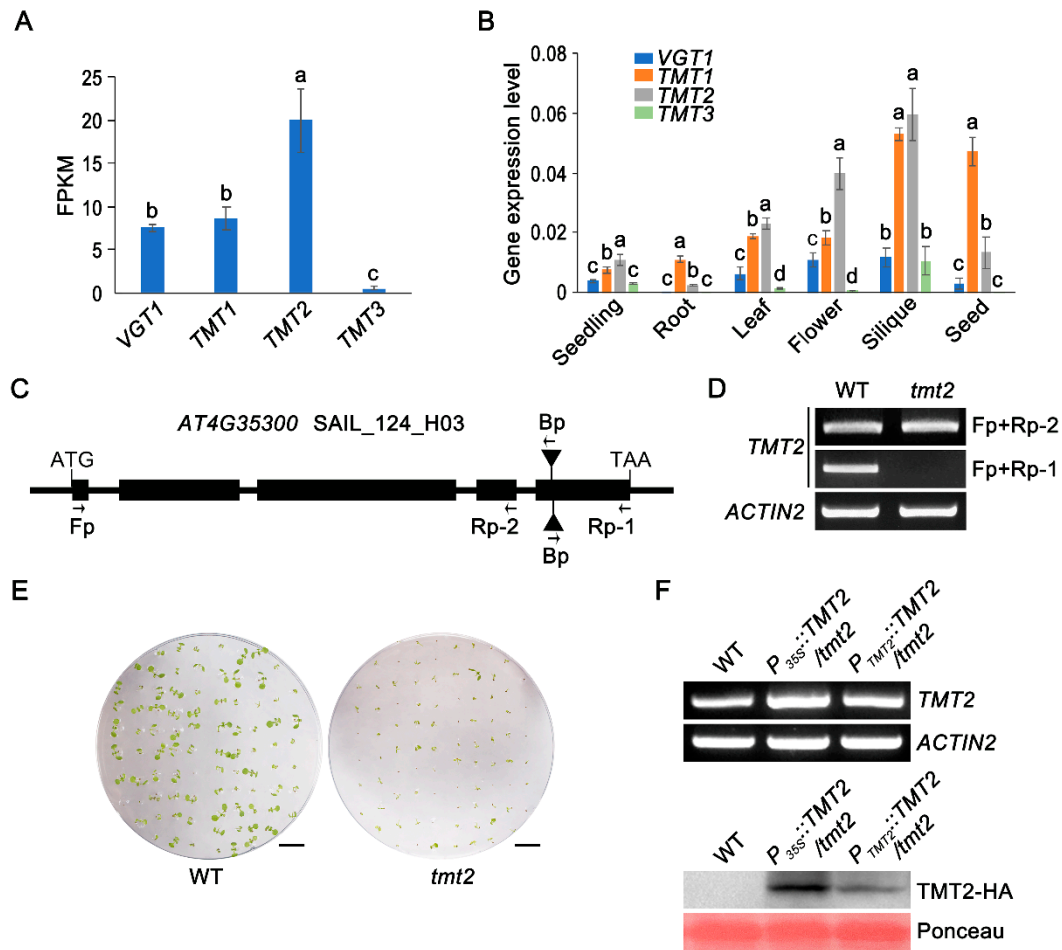

**Supplemental Figure S1. Characterization of the *TMT2* gene and the *tmt2* mutant.** (A) Gene expression levels of *VGT1*, *TMT1*, *TMT2*, and *TMT3* in 10-day-old wild-type (WT) seedlings achieved from RNA-seq analysis. FPKM: Fragments per kilobase of transcript per million mapped fragments. (B) Quantitative RT-PCR (qPT-PCR) analysis for the expression of *VGT1*, *TMT1*, *TMT2*, and *TMT3* in different tissues of WT Arabidopsis. *ACTIN8* was used as the reference gene. Error bars in A and B represent the standard deviation (SD) calculated from triplicate experiments. Different letters (a-d) indicate statistically significant differences among samples using one-way ANOVA with Tukey's mean test ( $P < 0.05$ ). (C) The schematic diagram of the *TMT2* gene and its T-DNA insertion site (black triangle). The black arrows represent the primers used for RT-PCR analysis in D. (D) RT-PCR analysis of *TMT2* transcripts in WT and *tmt2* plants. *ACTIN2* was used as the reference gene. (E) Seed germination and seedling initial growth of 7-day-old WT and *tmt2* on 1/2 MS with the coagulant phytigel media. Three experiments were performed. Scale bars = 1 cm. (F) Expression analysis of *TMT2* at RNA and Protein levels in 7-day-old WT, *P<sub>35S</sub>::TMT2/tmt2* and *P<sub>TMT2</sub>::TMT2/tmt2* complementation lines. Up panel: Semi-quantitative RT-PCR analysis of *TMT2*. *ACTIN2* was used as the reference. Bottom panel: Immunoblot analysis of TMT2-HA encoded by transferred *P<sub>35S</sub>::TMT2* and *P<sub>TMT2</sub>::TMT2* with anti-HA polyclonal antibody. The ponceau staining shows the equal loading of protein samples.

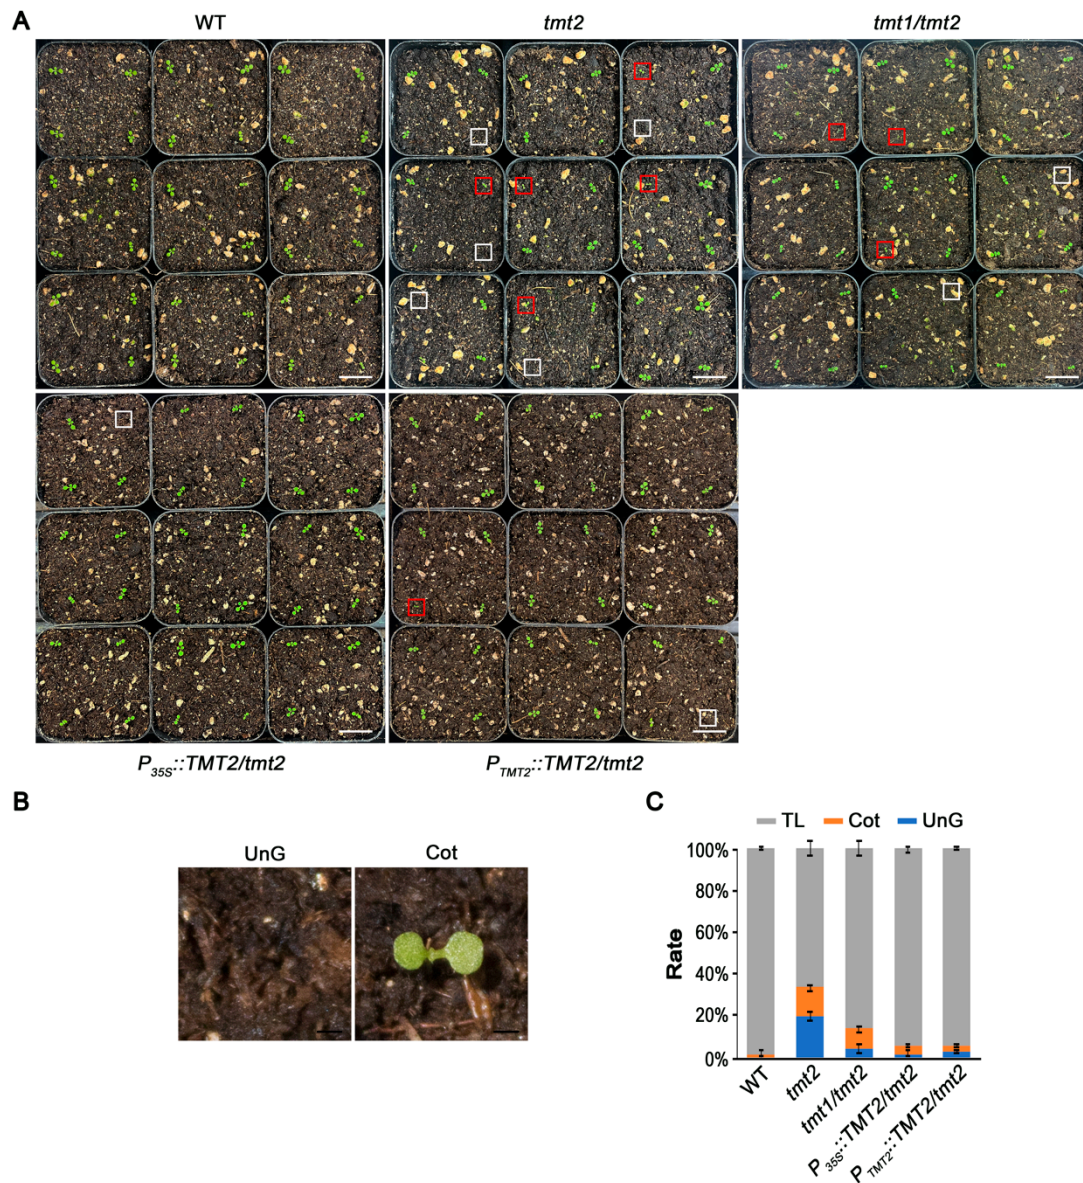

**Supplemental Figure S2. Germination and initial growth of WT, *tmt2*, *tmt1/tmt2*,  $P_{35S}::TMT2/tmt2$  and  $P_{TMT2}::TMT2/tmt2$  complementation lines in the soil.** (A) Growth of 10-day-old seedlings planted in the soil. Scale bars = 2 cm. White squares encompass un-germinated seeds (UnG), and red squares encompass seedlings arrested at the cotyledon stage (Cot). (B) Enlarged images of UnG and Cot in A. Scale bars = 1 mm. (C) Quantification results in A. A total of 252 seeds of each line were planted in the soil and growth was analyzed after 10 days. Error bars represent the SD of triplicate experiments.

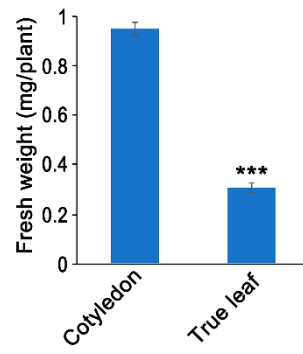

**Supplemental Figure S3. Fresh weight of cotyledons and true leaves from 7-day-old WT seedlings on 1/2 MS media.** Cotyledons and true leaves from 60 seedlings were analyzed. Error bars represent the SD of three biological replications. Significant differences are indicated as \*\*\*,  $P < 0.001$  by the Student's t-test.



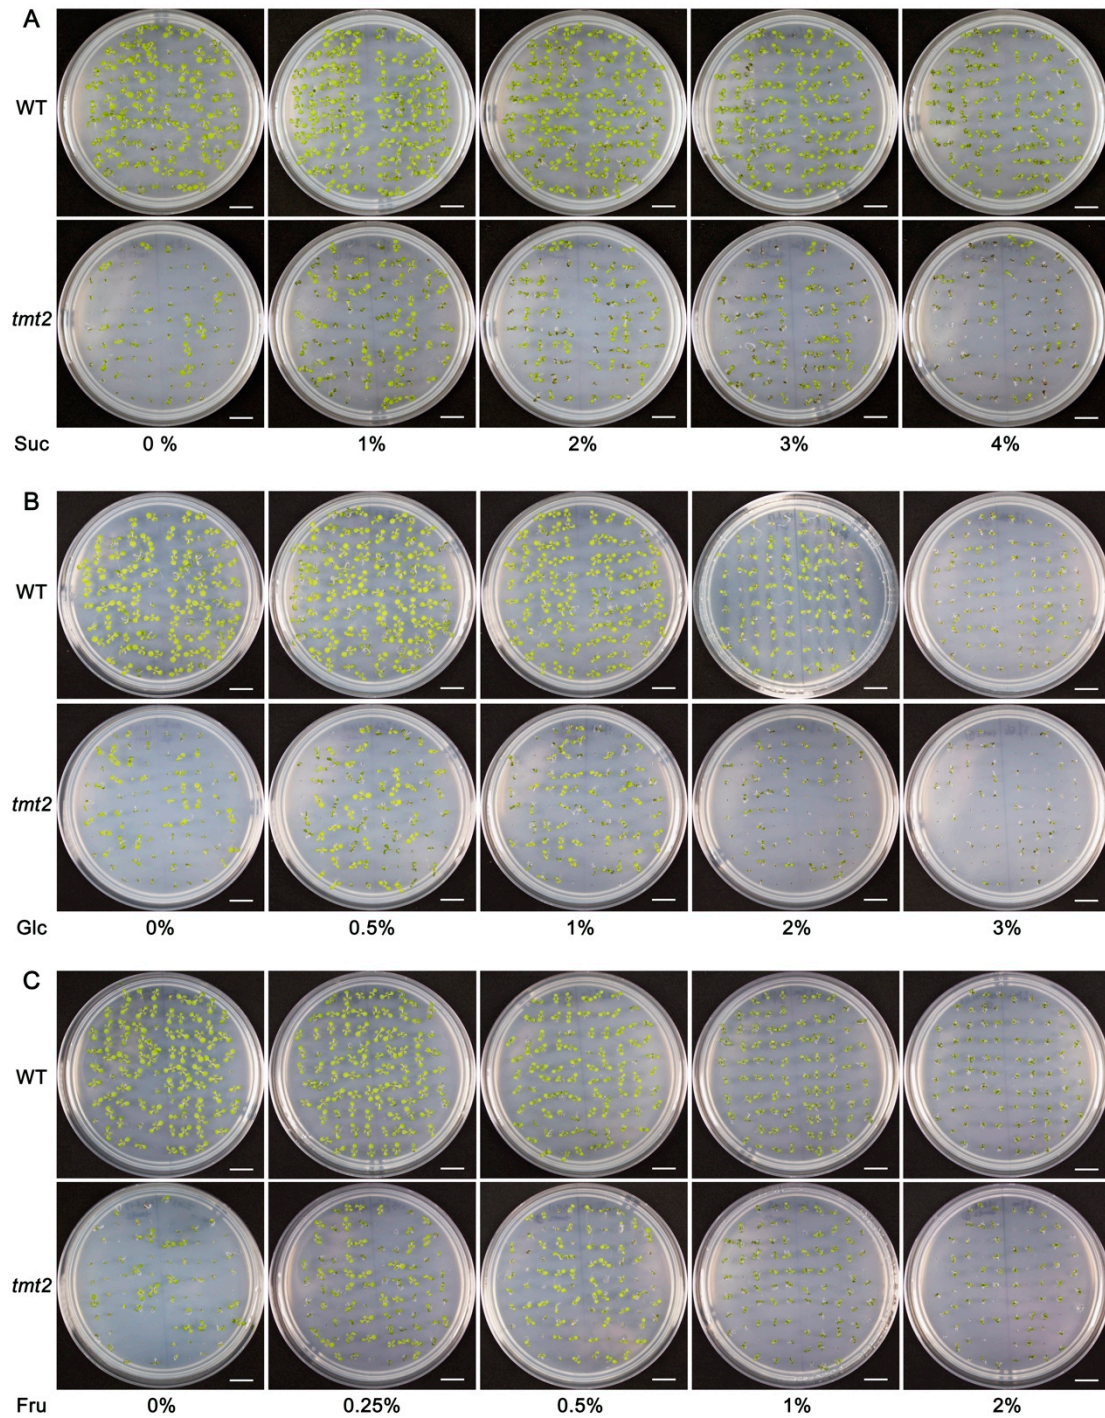

**Supplemental Figure S4. Phenotypes of WT and *tmt2* seedlings on 1/2 MS media with different sugars.** Initial growth of 7-day-old WT and *tmt2* seedlings on 1/2 MS media with different contents of sugars: (A) sucrose, (B) glucose, and (C) fructose. Each experiment is a representative of three repeats. Scale bars = 1 cm.

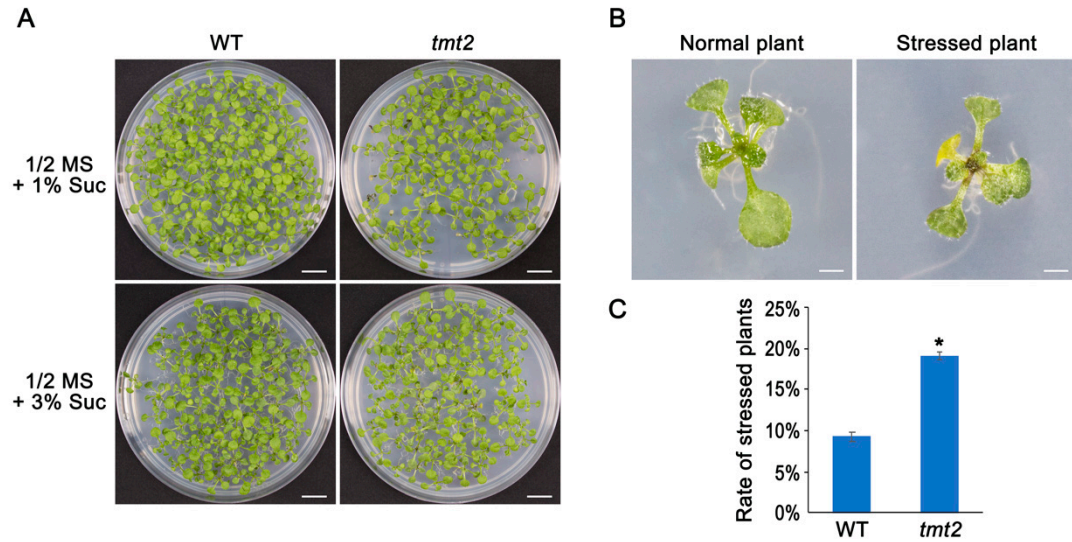

**Supplemental Figure S5. Sensitivity of WT and *tmt2* plants to high sugar.** (A) Top panel: WT and *tmt2* seedlings were grown for 12 days post-germination on 1/2 MS media with 1% sucrose. Bottom panel: WT and *tmt2-L* seedlings were initially grown for 5 days on 1/2 MS media with 1% sucrose and then were transferred onto 1/2 MS media with 3% sucrose for another 7 days of growth. Three experiments were repeated. Scale bars = 1 cm. (B) Enlarged images of normal and stressed plants on 1/2 MS media with 3% sucrose were presented. Plants with purple leaves were recorded as stressed plants. Scale bars = 1 mm. (C) Statistics analysis of stressed plants on 1/2 MS media with 3% sucrose in A was performed. A total of 234 seedlings of the WT and *tmt2-L* were analyzed. Error bars represent the SD of three biological replications. Significant differences are indicated as \*,  $P < 0.05$  by the Student's *t*-test.

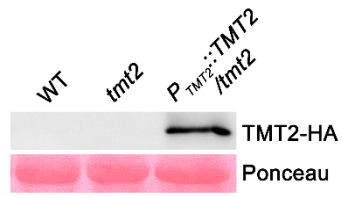

**Supplemental Figure S6. The protein level of TMT2 in the cotyledons.** The cotyledon samples were taken from 7-day-old WT, *tmt2*, and  $P_{TMT2}::TMT2/tmt2$  plants. The ponceau staining was used for the normalization of the TMT2 protein, which was immunoblotted against an anti-HA antibody.

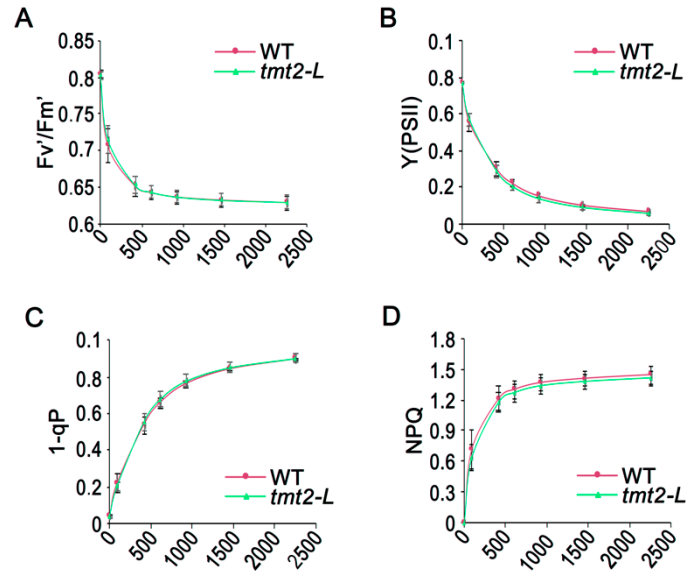

**Supplemental Figure S7. Photosynthesis parameter analysis of WT and *tmt2-L* plants.** (A) The light-induced curves of  $F_v'/F_m'$ , (B)  $Y(\text{PSII})$ , (C)  $1-qP$ , and (D) NPQ. Chlorophyll fluorescence analysis was performed on leaves of WT and *tmt2-L* plants grown for 24 days in the soil. Statistical analysis was performed on six biological replicates using the Student's t-test.

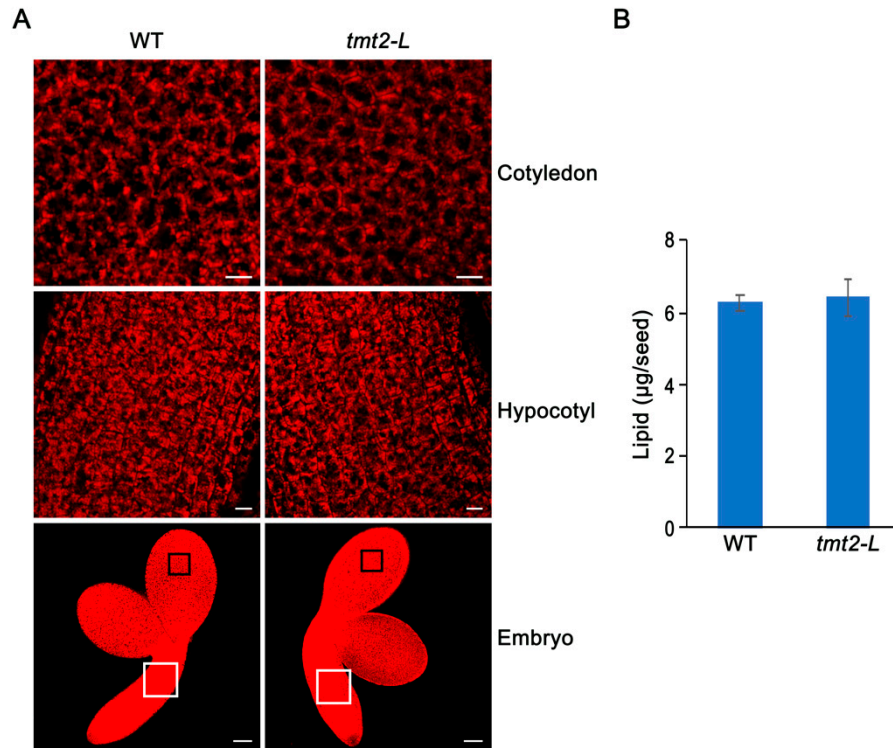

**Supplemental Figure S8. Analysis of lipid droplets and lipid contents of WT and *tmt2-L* embryos and seeds.** (A) Lipid droplets of WT and *tmt2-L* embryos at torpedo stage on the seventh day post-pollination stained with Nile red. Top: cotyledon, middle: hypocotyl, bottom: embryo. The black squares and white squares on embryos indicate the cotyledon and hypocotyl localization of image acquisition, respectively. Scale bars = 10 μm. (B) Lipid contents of WT and *tmt2-L* seeds. Error bars represent the SD of three biological replicates.



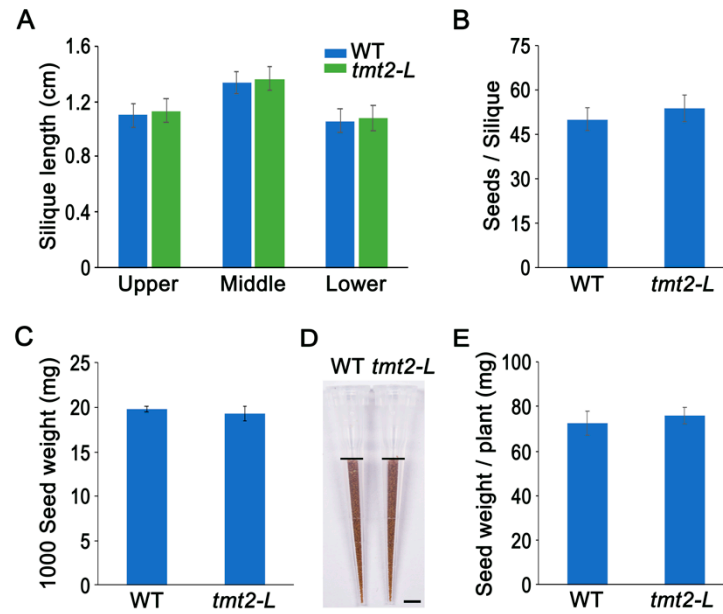

**Supplemental Figure S9. Silique and seed analysis of WT and *tmt2-L* plants.** (A) Length of siliques from the upper, middle, and lower parts of WT and *tmt2-L* plants. A total of 60 siliques from 12 plants were sampled. (B) Number of WT and *tmt2-L* seeds per silique. A total of 60 siliques from 12 plants were counted. (C) Weight of 1000 seeds from WT and *tmt2-L* plants with 3 independent pools. (D) 1000 seeds of WT and *tmt2-L* plants in tips. Scale bars = 0.5 cm. (E) Seed weights of WT and *tmt2-L* per plant. A total of 12 plants were sampled. Error bars represent the SD of triple repeats. Statistical analysis was performed between WT and *tmt2-L* plants using the Student's t-test.

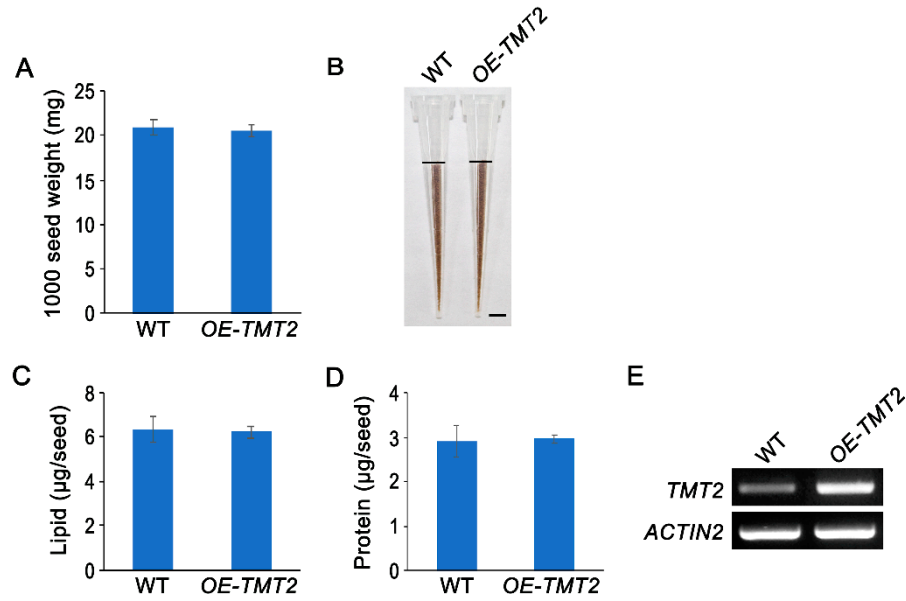

**Supplemental Figure S10. Silique and seed analysis of WT and OE-TMT2 plants.** (A) The weight of 1000 seeds from WT and OE-TMT2 plants with 3 independent pools. (B) The volume of 1000 seeds from WT and OE-TMT2 plants. Scale bars = 0.5 cm. (C) Lipid contents of WT and OE-TMT2 seeds. (D) Protein contents of the WT and OE-TMT2 seeds. Statistical analyses in A, C, and D were performed using the Student's t-test. (E) RT-PCR analysis of *TMT2* transcripts in 3-week-old WT and OE-TMT2 plants. The OE-TMT2 overexpression transgenic line was generated by transforming *P<sub>35S</sub>::TMT2* into WT plants. The transcript of *ACTIN2* was used as the reference.

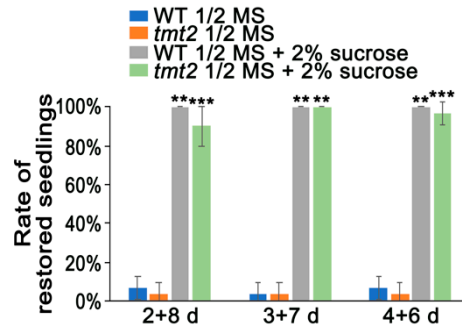

**Supplemental Figure S11. Rates of normal seedlings of cotyledon-defoliated WT and *tmt2* plants grown on 1/2 MS media with or without 2% sucrose.** WT and *tmt2* seedlings were initially grown on 1/2 MS media, and their cotyledons were removed on the second, third, or fourth day post-germination. The cotyledon-defoliated plants were further transferred onto 1/2 MS media without sucrose or 1/2 MS media with 2% sucrose for further growth until the tenth day post-germination. A total of 30 plants were analyzed. Error bars represent the SD of three biological replicates. Significant differences are indicated as \*\*,  $P < 0.01$  and \*\*\*,  $P < 0.001$  by the Student's t-test.

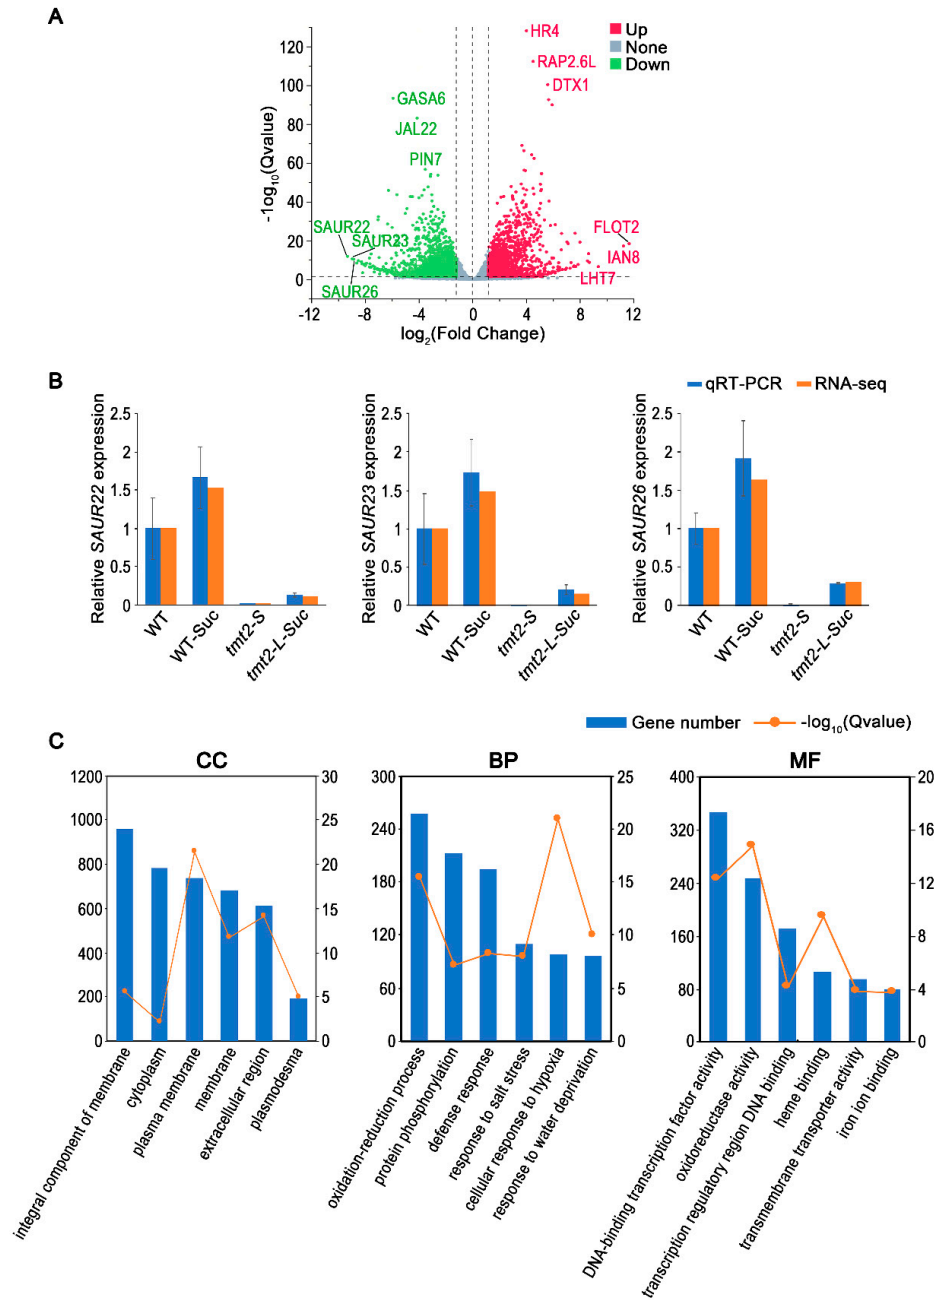

**Supplemental Figure S12. Volcano map and GO category of *tmt2* / WT DEGs and validation of RNA-seq data by qRT-PCR. (A)** Volcano map of *tmt2-S* / WT DEGs. The red color represents up-regulated DEGs, the blue color represents down-regulated DEGs, and the grey color represents non-DEGs. **(B)** The expression levels of *SAUR22*, *SAUR23*, and *SAUR26* in the WT, WT-Suc, *tmt2-S*, and *tmt2-L-Suc* seedlings validated by qRT-PCR in comparison to the RNA-seq data. *ACTIN8* was used as the reference gene. Error bars represent the SD of triple repeats. **(C)** GO functional enrichment analysis of *tmt2* / WT DEGs.

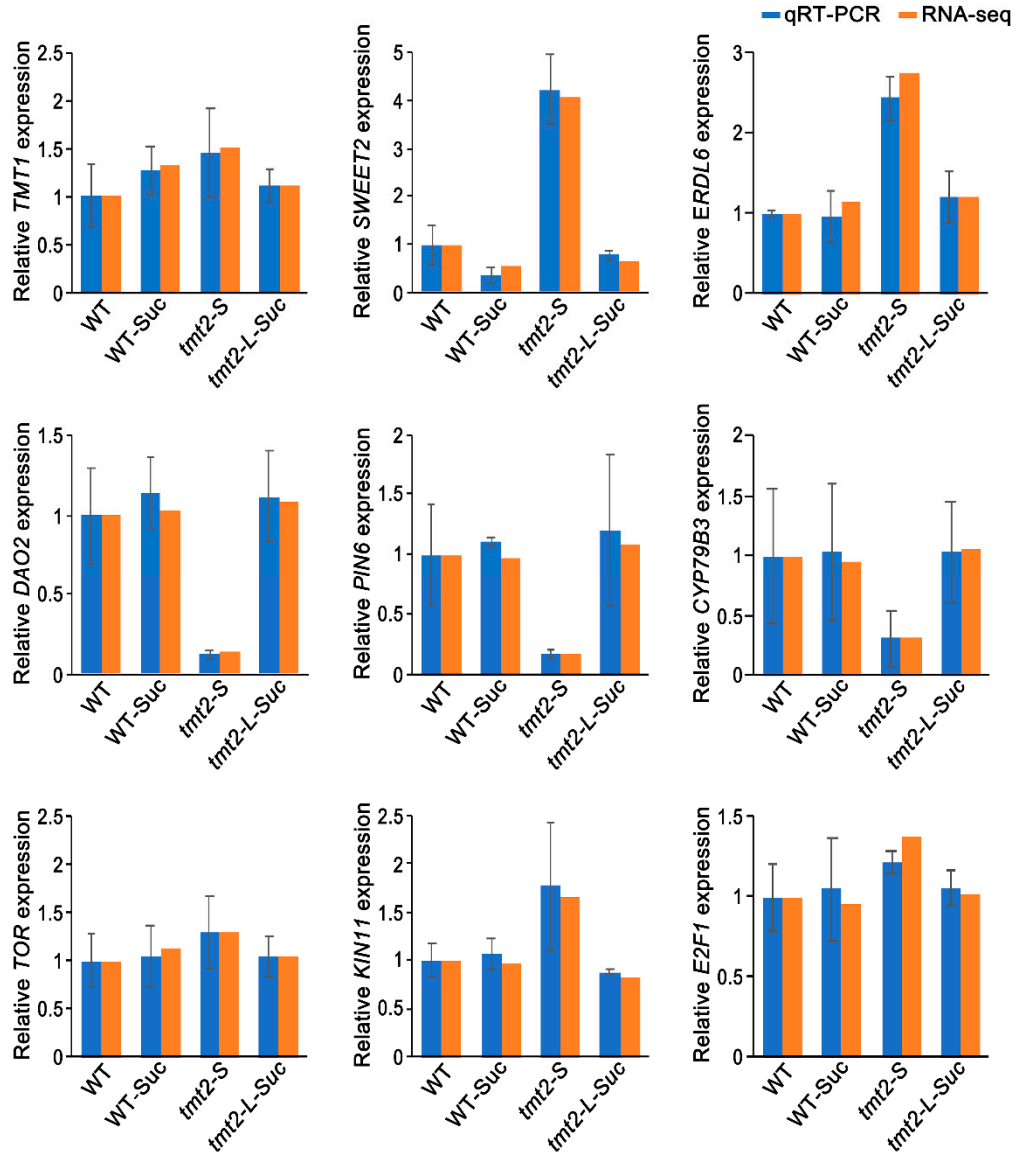

**Supplemental Figure S13.** Expression levels of representative genes of *tmt2* / WT DEGs retested by qRT-PCR. The expression levels of *TMT1*, *SWEET2*, *ERDL6*, *DAO2*, *PIN6*, *CYP79B3*, *TOR*, *KIN11*, and *E2F1* in the WT, WT-Suc, *tmt2-S*, and *tmt2-L-Suc* were validated by qRT-PCR in comparison to the RNA-seq data. *ACTIN8* was used as the reference gene. Error bars represent the SD of triple repeats.



**Supplemental Table S1:** List of primers used in this study

| Primer name                               | Primer sequences (5'-3')                                        | Function                                                                                                    |
|-------------------------------------------|-----------------------------------------------------------------|-------------------------------------------------------------------------------------------------------------|
| VGT1-Fp-qRT                               | CCGGAATTCATGGGGTTTGATCCCGAGAAC                                  | qRT-PCR analysis of <i>VGT1</i> gene                                                                        |
| VGT1-Rp-qRT                               | TGCGTCGACCGGAGGAATGGCTGCAAGAAC                                  |                                                                                                             |
| TMT1-Fp-qRT                               | CGGAGAGATTTCAAGGCAAAGCT                                         | qRT-PCR analysis of <i>TMT1</i> gene                                                                        |
| TMT1-Rp-qRT                               | GTCTGCCGAGCCAATCAGATATC                                         |                                                                                                             |
| TMT2-Fp-qRT                               | GTCGAATTCATGAGTGGAGCTGTGCTTGTTGC                                | qRT-PCR analysis of <i>TMT2</i> gene                                                                        |
| TMT2-Rp-qRT                               | CATGTTGTAATCAGAGTAGCACC                                         |                                                                                                             |
| TMT3-Fp-qRT                               | ATGAGGAGTGTAGTGCTTGTTGC                                         | qRT-PCR analysis of <i>TMT3</i> gene                                                                        |
| TMT3-Rp-qRT                               | AAGTGGCTCCAATGAGAGACAT                                          |                                                                                                             |
| <i>tmt2</i> -Lp                           | AGTTCTTCCTCAGCATCCTTACT                                         | Identification of <i>tmt2</i> mutant                                                                        |
| <i>tmt2</i> -Rp-1                         | GTCGTCGACTCACTCGTTTTTAGCAGCTTCAGC                               |                                                                                                             |
| SAIL-Bp                                   | GCCTTTTCAGAAATGGATAAATAGCCTTGCTTCC                              | RT-PCR analysis of <i>tmt2</i> mutant                                                                       |
| <i>tmt2</i> -Fp                           | GTCGAATTCATGAGTGGAGCTGTGCTTGTTGC                                |                                                                                                             |
| <i>tmt2</i> -Rp-1                         | GTCGTCGACTCACTCGTTTTTAGCAGCTTCAGC                               |                                                                                                             |
| <i>tmt2</i> -Rp-2                         | CTTCGACCAGAAAGATCCATGAGC                                        |                                                                                                             |
| <i>tmt2</i> -Lp                           | AGTTCTTCCTCAGCATCCTTACT                                         | RT-PCR analysis of <i>P<sub>35S</sub>::TMT2/tmt2</i> and <i>P<sub>TMT2</sub>::TMT2/tmt2</i> lines           |
| <i>tmt2</i> -Rp-1                         | GTCGTCGACTCACTCGTTTTTAGCAGCTTCAGC                               |                                                                                                             |
| TMT2-Fp (pRI101-AN)                       | ATAGTCGACATGAGTGGAGCTGTGCTTGTTGC                                | Constructs of pRI101- <i>P<sub>35S</sub>::TMT2</i> - <i>HA</i> and pRI101- <i>P<sub>TMT2</sub>::TMT2-HA</i> |
| TMT2-HA-Rp (pRI101-AN)                    | GCCGAATTCTCAAGCGTAATCTGGAACATC<br>GTATGGGTACTCGTTTTTAGCAGCTTCAG |                                                                                                             |
| 35S-F                                     | ATGACGCACAATCCCACTATC                                           | Identification of transgene plants with <i>TMT2</i> gene                                                    |
| <i>tmt2</i> -Rp-1                         | GTCGTCGACTCACTCGTTTTTAGCAGCTTCAGC                               |                                                                                                             |
| ACTIN2-Fp                                 | CTCTCCCGCTATGTATGTCGCCAT                                        | RT-PCR analysis of <i>ACTIN2</i> gene                                                                       |
| ACTIN2-Rp                                 | TGTGAACGATTCTGGACCTGCCT                                         |                                                                                                             |
| <i>P<sub>TMT2</sub></i> -Fp (pCAMBIA1305) | GATCTGCAGCTGTGGTGTGTACTGTAGTTCC                                 | Constructs of pCAMBIA1305- <i>P<sub>TMT2</sub>::GUS</i> and                                                 |
| <i>P<sub>TMT2</sub></i> -Rp (pCAMBIA1305) | GCGCCATGGAATCCGTCTTCTATCTTTTATC                                 |                                                                                                             |

---

|                          |                                  |                                                           |
|--------------------------|----------------------------------|-----------------------------------------------------------|
|                          |                                  | pRI101- <i>P<sub>TMT2</sub></i> ::<br><i>TMT2-HA</i>      |
| GUS-Fp                   | CGTATCGTGCTCCGCTTCGGCTCTG        | Identification                                            |
| GUS-Rp                   | TCTTCATAGACATCGATGGTCAGTC        | transgene plants<br>with <i>P<sub>TMT2</sub>-GUS</i> gene |
| TMT2-Fp<br>(pCAMBIA2300) | ATCGGTACCATGAGTGGAGCTGTGCTTGTTGC | Construct of                                              |
| TMT2-Rp<br>(pCAMBIA2300) | GCAGTCGACCTCGTTTTAGCAGCTTCAGCTTG | pCAMBIA2300-<br><i>P<sub>35S</sub>::TMT2-eGFP</i>         |
| eGFP-Fp                  | GTGAAGGTGATGCAACATACGGAA         | Identification of                                         |
| eGFP-Rp                  | GTGGACAGGTAATGGTTGTCTGGT         | transgene plants<br>with <i>TMT2-eGFP</i><br>fused gene   |
| SAUR22-Fp-qRT            | ATGGCTCTGGTGAGAAGTCTACT          | qRT-PCR analysis of                                       |
| SAUR22-Rp-qRT            | TTGGTTCAAGTATGAGAGTGGCA          | <i>SAUR22</i> gene                                        |
| SAUR23-Fp-qRT            | ATGGCTTTGGTGAGAAGTCTAT           | qRT-PCR analysis of                                       |
| SAUR23-Rp-qRT            | GCTGGTTCAAGTATGAGAGTGGC          | <i>SAUR23</i> gene                                        |
| SAUR26-Fp-qRT            | ATGGCTTTGGTGAGAAGTCTCTT          | qRT-PCR analysis of                                       |
| SAUR26-Rp-qRT            | GGTTCAAGTATGAGACTGGTACAA         | <i>SAUR26</i> gene                                        |
| ACTIN8-Fp                | GGTTCTACTTACCGAGGCTCC            | qRT-PCR analysis of                                       |
| ACTIN8-Rp                | GATAGGCACAGTGTGAGACAC            | <i>ACTIN8</i> gene                                        |

---
